# Supplementary material for: Radiation-induced pulmonary gene expression changes are attenuated by the CTGF antibody Pamrevlumab
Source: Respir Res. 2018 Jan 18;19:14. doi: 10.1186/s12931-018-0720-4 (PMC5774112; doi:10.1186/s12931-018-0720-4)
Supplement: Supplementary file 6 — Broad Gene Sets Associated with Radiation and FG-3019 Responsive Genes. (XLSX 18 kb) [file 12931_2018_720_MOESM6_ESM.xlsx]

## Sheet: Table S6
Table S6: Broad Gene Sets Associated with Radiation and FG-3019 Responsive Genes
Gene set enrichment analysis (GSEA) was run on all PCA1-ordered genes using the Broad Molecular Signatures Database. Gene sets with a normalized enrichment score (NES) > 2 and family-wise error rate p < 0.01 for gene sets directly associated with PCA1 (i.e., the RT-elevated pole) or a nominal p < 0.01 for gene sets inversely associated with PCA1 (i.e., the RT-diminished pole) are listed by enrich…
Gene Sets Associated with RT-elevated Genes						Gene Sets Associated with RT-diminished Genes
Set ID	Gene Set Name	Size	NES	Cluster		Set ID	Gene Set Name	Size	NES	Cluster
M4345	LIAN_LIPA_TARGETS_6M	74	3.50622			M9257	KEGG_DRUG_METABOLISM_CYTOCHROME_P450	38	-2.93581	GST
M19618	ICHIBA_GRAFT_VERSUS_HOST_DISEASE_35D_UP	119	3.48083			M1443	REACTOME_GLUTATHIONE_CONJUGATION	16	-2.68535	GST
M1278	MCLACHLAN_DENTAL_CARIES_DN	168	3.4105			M16794	KEGG_METABOLISM_OF_XENOBIOTICS_BY_CYTOCHROME_P450	35	-2.66843	GST
M14829	HESS_TARGETS_OF_HOXA9_AND_MEIS1_DN	73	3.39229			M12671	SENGUPTA_NASOPHARYNGEAL_CARCINOMA_DN	165	-2.56698
M16088	LIAN_LIPA_TARGETS_3M	63	3.38091			M737	LIEN_BREAST_CARCINOMA_METAPLASTIC_VS_DUCTAL_DN	61	-2.28672
M10454	MCLACHLAN_DENTAL_CARIES_UP	151	3.35462			M3062	CREIGHTON_ENDOCRINE_THERAPY_RESISTANCE_2	180	-2.25478
M15606	MARKEY_RB1_ACUTE_LOF_UP	196	3.35265			M7396	SWEET_LUNG_CANCER_KRAS_DN	385	-2.23737
M15664	ROSTY_CERVICAL_CANCER_PROLIFERATION_CLUSTER	109	3.34981	Cell Cycle		M11302	SMID_BREAST_CANCER_RELAPSE_IN_LUNG_DN	28	-2.09586
M5369	POOLA_INVASIVE_BREAST_CANCER_UP	209	3.30724	Cell Cycle		M1145	YAO_TEMPORAL_RESPONSE_TO_PROGESTERONE_CLUSTER_1	56	-2.08327
M13438	STEARMAN_TUMOR_FIELD_EFFECT_UP	35	3.26714			M10660	YAO_HOXA10_TARGETS_VIA_PROGESTERONE_UP	77	-2.05368
M5686	MARKEY_RB1_CHRONIC_LOF_DN	96	3.26713			M1840	KEGG_GLUTATHIONE_METABOLISM	41	-2.0379	GST
M5487	ICHIBA_GRAFT_VERSUS_HOST_DISEASE_D7_UP	98	3.21086			M15031	STREICHER_LSM1_TARGETS_UP	39	-1.99667
M5389	RODWELL_AGING_KIDNEY_UP	239	3.0285	ECM		M7946	KEGG_NOTCH_SIGNALING_PATHWAY	39	-1.95104
M1399	KHETCHOUMIAN_TRIM24_TARGETS_UP	44	3.0123			M8256	REACTOME_GENERIC_TRANSCRIPTION_PATHWAY	15	-1.87106
M11620	WIELAND_UP_BY_HBV_INFECTION	73	3.00288			M766	KEGG_GLYCINE_SERINE_AND_THREONINE_METABOLISM	27	-1.85517
M4888	ZHAN_MULTIPLE_MYELOMA_PR_UP	26	2.97619	Cell Cycle		M904	RICKMAN_TUMOR_DIFFERENTIATED_WELL_VS_POORLY_UP	151	-1.84784
M19695	FLECHNER_BIOPSY_KIDNEY_TRANSPLANT_REJECTED_VS_OK_UP	73	2.97324			M6241	VALK_AML_CLUSTER_8	17	-1.82805
M3766	SOTIRIOU_BREAST_CANCER_GRADE_1_VS_3_UP	113	2.95529	Cell Cycle		M12824	SHEDDEN_LUNG_CANCER_GOOD_SURVIVAL_A4	141	-1.82296
M10739	CROONQUIST_NRAS_SIGNALING_DN	53	2.95097	Cell Cycle		M9911	WOO_LIVER_CANCER_RECURRENCE_DN	58	-1.76549
M18506	CROONQUIST_IL6_DEPRIVATION_DN	69	2.92232	Cell Cycle		M1752	VANHARANTA_UTERINE_FIBROID_WITH_7Q_DELETION_UP	52	-1.75545
M4502	GAL_LEUKEMIC_STEM_CELL_DN	165	2.88866			M2044	KEGG_SPLICEOSOME	84	-1.75483
M1037	KANG_DOXORUBICIN_RESISTANCE_UP	43	2.87795	Cell Cycle		M2204	TURASHVILI_BREAST_NORMAL_DUCTAL_VS_LOBULAR_UP	42	-1.71879
M10880	STEARMAN_LUNG_CANCER_EARLY_VS_LATE_DN	51	2.87213			M10320	REACTOME_BIOLOGICAL_OXIDATIONS	75	-1.6979	GST
M1249	YU_MYC_TARGETS_UP	38	2.86831	Cell Cycle		M2214	CHEMNITZ_RESPONSE_TO_PROSTAGLANDIN_E2_DN	225	-1.61626
M17951	NAKAYAMA_SOFT_TISSUE_TUMORS_PCA1_UP	53	2.84619			M19529	RODRIGUES_THYROID_CARCINOMA_ANAPLASTIC_DN	335	-1.59075
M11884	GOLDRATH_ANTIGEN_RESPONSE	303	2.81824	Cell Cycle		M7141	RICKMAN_TUMOR_DIFFERENTIATED_WELL_VS_MODERATELY_UP	68	-1.55687
M3268	CHIANG_LIVER_CANCER_SUBCLASS_PROLIFERATION_UP	121	2.81143	Cell Cycle		M13273	DELYS_THYROID_CANCER_DN	182	-1.55626
M6451	ODONNELL_TFRC_TARGETS_DN	83	2.77959	Cell Cycle		M1451	NAKAYAMA_SOFT_TISSUE_TUMORS_PCA2_DN	59	-1.52057
M11428	GAURNIER_PSMD4_TARGETS	33	2.76284	Cytokine		M17094	GINESTIER_BREAST_CANCER_ZNF217_AMPLIFIED_DN	192	-1.51774
M18107	WILENSKY_RESPONSE_TO_DARAPLADIB	23	2.74805			M1662	REACTOME_SIGNALING_BY_BMP	21	-1.49297
M2761	NAKAYAMA_SOFT_TISSUE_TUMORS_PCA2_UP	71	2.74574	Cell Cycle		M17299	CHARAFE_BREAST_CANCER_LUMINAL_VS_MESENCHYMAL_UP	277	-1.48229
M4491	CROONQUIST_NRAS_VS_STROMAL_STIMULATION_DN	68	2.74086	Cell Cycle		M16355	MELLMAN_TUT1_TARGETS_DN	39	-1.4407
M5319	APPEL_IMATINIB_RESPONSE	29	2.71815			M4925	STEARMAN_LUNG_CANCER_EARLY_VS_LATE_UP	95	-1.41168
M12804	LE_EGR2_TARGETS_UP	92	2.69937	Cell Cycle		M18788	REACTOME_PHASE_II_CONJUGATION	38	-1.40742	GST
M12225	PICCALUGA_ANGIOIMMUNOBLASTIC_LYMPHOMA_UP	157	2.69686	ECM		M17423	LAIHO_COLORECTAL_CANCER_SERRATED_DN	59	-1.37582
M19541	REN_ALVEOLAR_RHABDOMYOSARCOMA_DN	347	2.68835			M14449	BIOCARTA_ETS_PATHWAY	17	-1.34818
M8776	HELLER_SILENCED_BY_METHYLATION_UP	196	2.68181			M11672	GARGALOVIC_RESPONSE_TO_OXIDIZED_PHOSPHOLIPIDS_BLUE_UP	78	-1.34104
M17471	SCHUETZ_BREAST_CANCER_DUCTAL_INVASIVE_UP	265	2.67643	ECM		M12001	SHEDDEN_LUNG_CANCER_GOOD_SURVIVAL_A5	41	-1.33401
M5198	GRAHAM_NORMAL_QUIESCENT_VS_NORMAL_DIVIDING_DN	67	2.67517	Cell Cycle		M15472	VECCHI_GASTRIC_CANCER_EARLY_DN	248	-1.24677
M11266	KEGG_LYSOSOME	107	2.66105
M11825	BRUECKNER_TARGETS_OF_MIRLET7A3_DN	52	2.66062
M12457	LY_AGING_MIDDLE_DN	15	2.60978	Cell Cycle
M9402	SCIAN_CELL_CYCLE_TARGETS_OF_TP53_AND_TP73_DN	22	2.58892	Cell Cycle
M7339	FURUKAWA_DUSP6_TARGETS_PCI35_DN	46	2.58228	Cell Cycle
M7357	LEE_EARLY_T_LYMPHOCYTE_UP	56	2.56284	Cell Cycle
M178	CROMER_TUMORIGENESIS_UP	39	2.55398
M13547	TURASHVILI_BREAST_LOBULAR_CARCINOMA_VS_LOBULAR_NORMAL_DN	52	2.54734	ECM
M4723	TONKS_TARGETS_OF_RUNX1_RUNX1T1_FUSION_HSC_DN	135	2.54305
M16010	KOBAYASHI_EGFR_SIGNALING_24HR_DN	194	2.54027	Cell Cycle
M3645	DELYS_THYROID_CANCER_UP	361	2.54016
M1138	CROONQUIST_NRAS_SIGNALING_UP	25	2.52708
M5588	HOFFMANN_LARGE_TO_SMALL_PRE_BII_LYMPHOCYTE_UP	78	2.5269	Cell Cycle
M3155	GRAHAM_CML_DIVIDING_VS_NORMAL_QUIESCENT_UP	139	2.51258	Cell Cycle
M17466	SANA_TNF_SIGNALING_UP	56	2.51242	Cytokine
M2310	DANG_REGULATED_BY_MYC_DN	208	2.51159
M5311	HOSHIDA_LIVER_CANCER_SUBCLASS_S1	204	2.5112
M7585	TURASHVILI_BREAST_DUCTAL_CARCINOMA_VS_DUCTAL_NORMAL_UP	31	2.51092	ECM
M13796	THUM_MIR21_TARGETS_HEART_DISEASE_UP	17	2.50645
M682	FARMER_BREAST_CANCER_CLUSTER_5	17	2.4992	ECM
M8365	RHODES_UNDIFFERENTIATED_CANCER	57	2.4926	Cell Cycle
M19971	RUTELLA_RESPONSE_TO_HGF_VS_CSF2RB_AND_IL4_UP	304	2.48785
M5929	CROONQUIST_STROMAL_STIMULATION_UP	40	2.47633
M10165	TURASHVILI_BREAST_LOBULAR_CARCINOMA_VS_DUCTAL_NORMAL_UP	52	2.46101	ECM
M8582	RUTELLA_RESPONSE_TO_CSF2RB_AND_IL4_DN	229	2.459
M10279	HORIUCHI_WTAP_TARGETS_DN	229	2.45681	Cell Cycle
M14767	AMUNDSON_GAMMA_RADIATION_RESPONSE	31	2.45526	Cell Cycle
M11537	CHANG_CYCLING_GENES	30	2.45468	Cell Cycle
M17033	LINDSTEDT_DENDRITIC_CELL_MATURATION_A	49	2.45067	Cytokine
M4785	FULCHER_INFLAMMATORY_RESPONSE_LECTIN_VS_LPS_DN	283	2.45031	Cytokine
M4861	VERHAAK_AML_WITH_NPM1_MUTATED_UP	140	2.4477
M11250	FRASOR_RESPONSE_TO_SERM_OR_FULVESTRANT_DN	42	2.4438	Cell Cycle
M6792	ODONNELL_TARGETS_OF_MYC_AND_TFRC_DN	28	2.44244	Cell Cycle
M12289	REACTOME_PEPTIDE_LIGAND_BINDING_RECEPTORS	120	2.44139	Cytokine
M19097	SWEET_LUNG_CANCER_KRAS_UP	411	2.44076
M12195	FOSTER_TOLERANT_MACROPHAGE_UP	143	2.43991
M18400	YAO_TEMPORAL_RESPONSE_TO_PROGESTERONE_CLUSTER_16	69	2.42813
M7388	TAKEDA_TARGETS_OF_NUP98_HOXA9_FUSION_10D_DN	101	2.42513
M7854	WHITEFORD_PEDIATRIC_CANCER_MARKERS	87	2.424	Cell Cycle
M9936	PAPASPYRIDONOS_UNSTABLE_ATEROSCLEROTIC_PLAQUE_UP	39	2.42314
M12890	ROZANOV_MMP14_TARGETS_UP	187	2.41089
M17788	LINDGREN_BLADDER_CANCER_CLUSTER_1_DN	292	2.40986	Cell Cycle
M9893	RODWELL_AGING_KIDNEY_NO_BLOOD_UP	118	2.40171	ECM
M8467	JISON_SICKLE_CELL_DISEASE_UP	146	2.37433
M4479	TURASHVILI_BREAST_DUCTAL_CARCINOMA_VS_LOBULAR_NORMAL_UP	48	2.37138	ECM
M10319	WALLACE_PROSTATE_CANCER_RACE_UP	205	2.36927
M6905	JAATINEN_HEMATOPOIETIC_STEM_CELL_DN	152	2.36722
M14985	BASAKI_YBX1_TARGETS_UP	205	2.35403	Cell Cycle
M15606	RASHI_RESPONSE_TO_IONIZING_RADIATION_6	73	2.35295
M986	SMIRNOV_CIRCULATING_ENDOTHELIOCYTES_IN_CANCER_UP	131	2.35183
M4737	VERRECCHIA_EARLY_RESPONSE_TO_TGFB1	45	2.35129
M5669	KEGG_NATURAL_KILLER_CELL_MEDIATED_CYTOTOXICITY	90	2.34971
M19875	SENGUPTA_NASOPHARYNGEAL_CARCINOMA_UP	198	2.34818	ECM
M17557	DANG_MYC_TARGETS_DN	28	2.3466
M9167	ROZANOV_MMP14_TARGETS_SUBSET	31	2.34594
M4995	LINDGREN_BLADDER_CANCER_CLUSTER_2B	296	2.34501
M6370	KEGG_P53_SIGNALING_PATHWAY	60	2.34483
M19957	FERREIRA_EWINGS_SARCOMA_UNSTABLE_VS_STABLE_UP	92	2.34033
M18395	URS_ADIPOCYTE_DIFFERENTIATION_DN	28	2.3388	ECM
M3053	MULLIGHAN_MLL_SIGNATURE_2_UP	307	2.33748
M16441	REACTOME_INTEGRIN_CELL_SURFACE_INTERACTIONS	76	2.33724	ECM
